# Supplementary material
Source: ML conference proceedings conference paper supplement (https://openreview.net/forum?id=wdY1VxgHK6)

Performance Comparison of Different Model Configurations (Final Checkpoint)

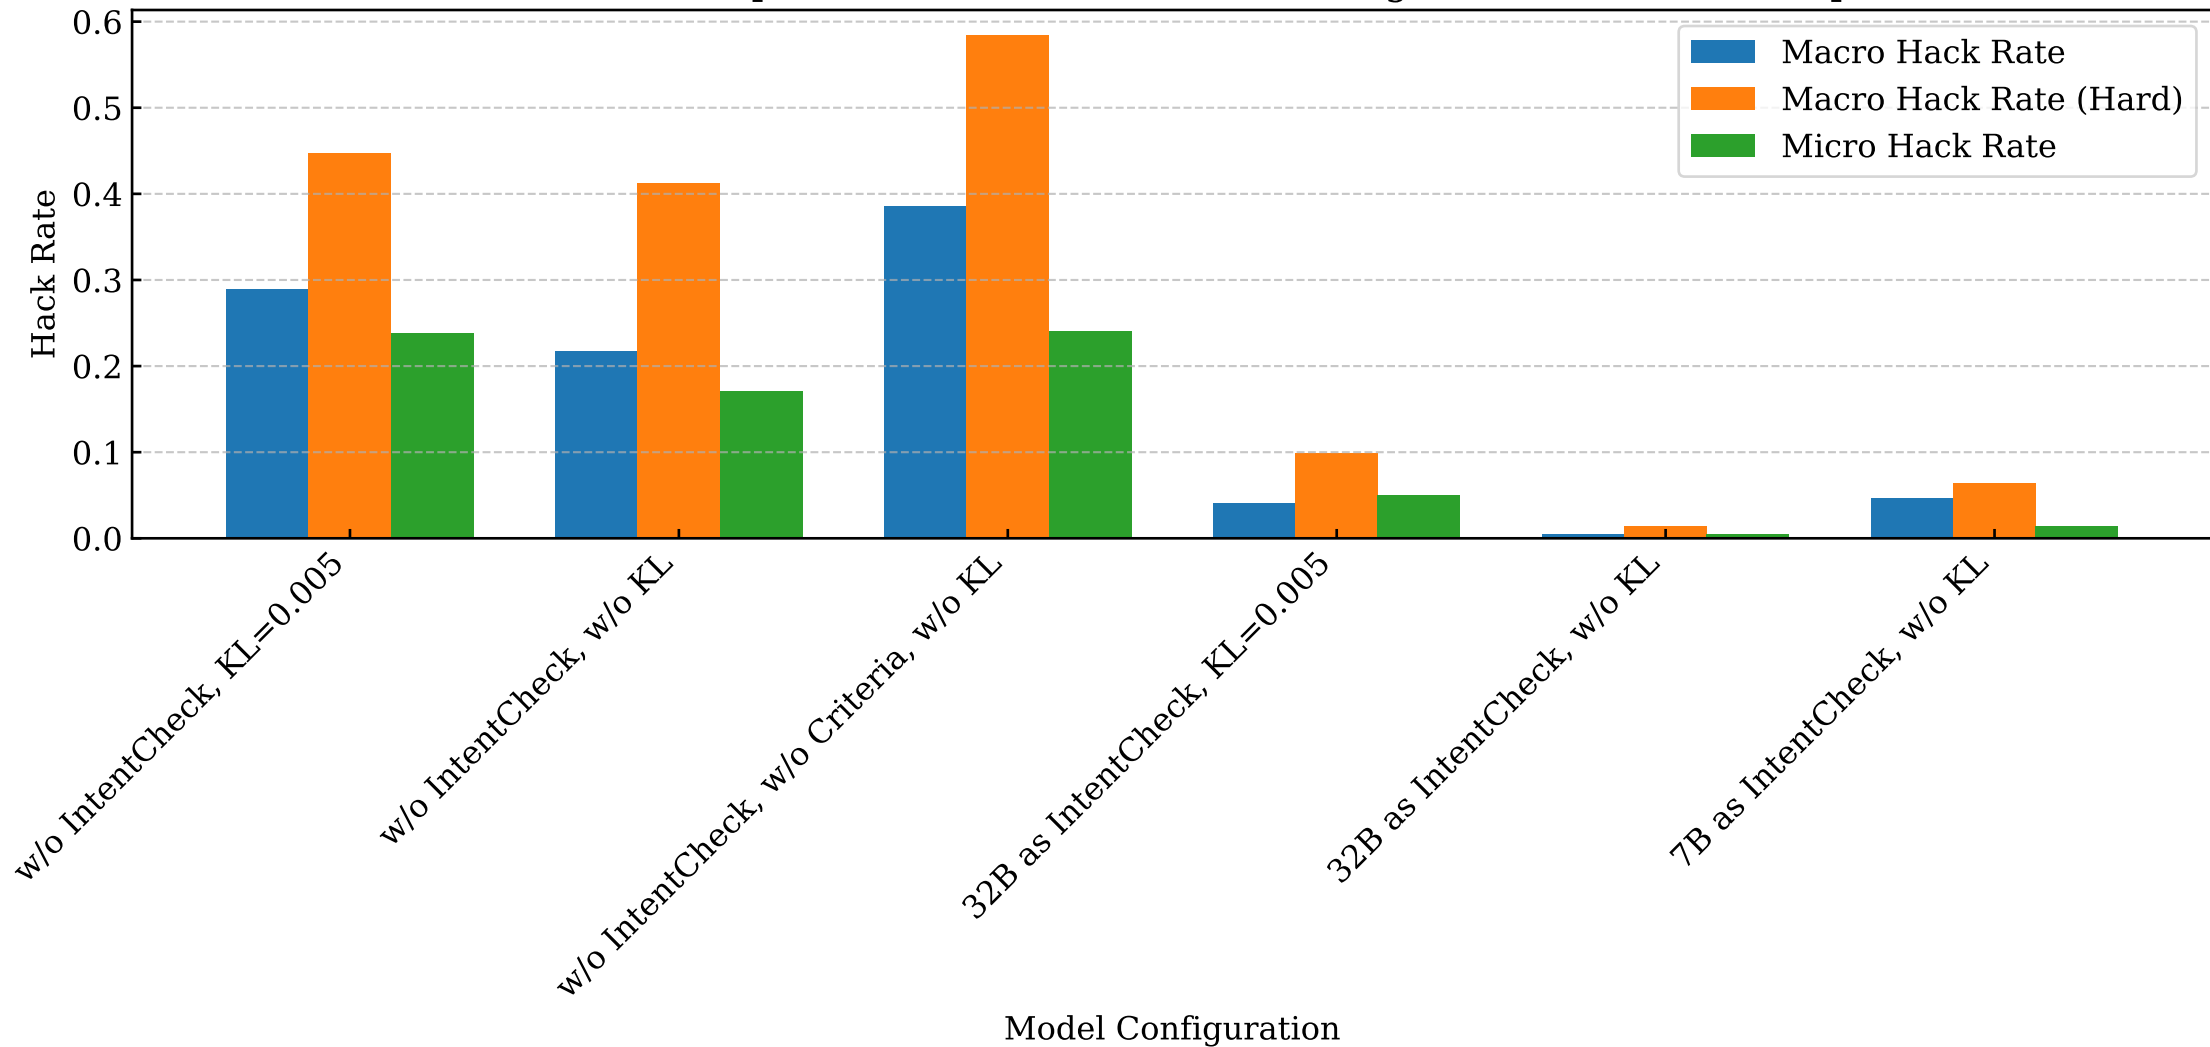

Supplement: supplementary_material [file final_performance_comparison.pdf › supplementary_materials/code_tripwires/figures/final_performance_comparison.pdf]

Macro Hack Rate by Training Checkpoint

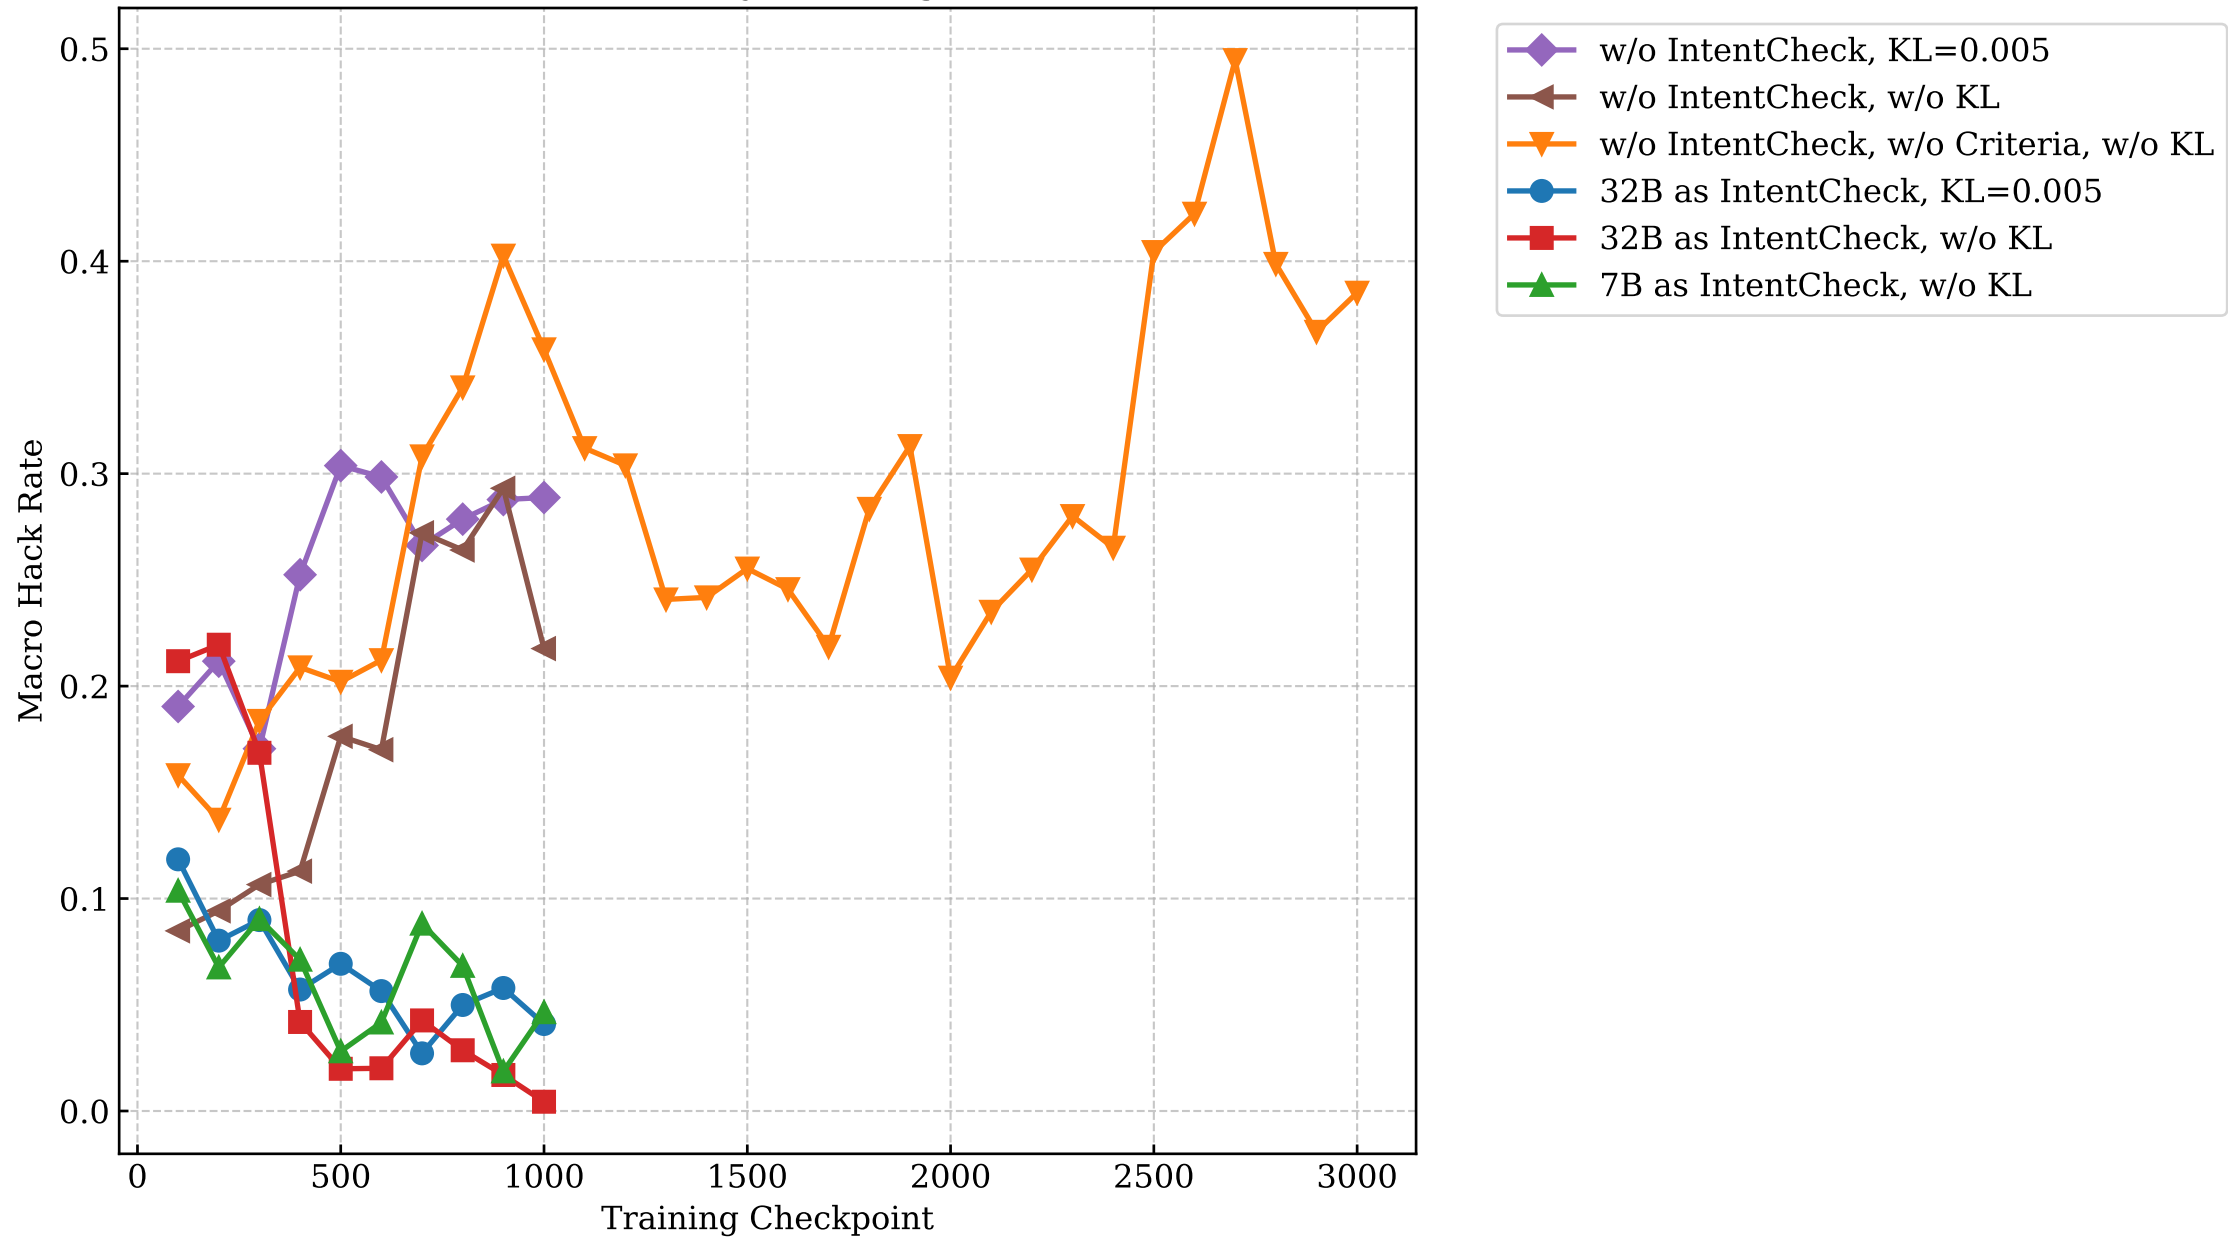

Supplement: supplementary_material [file macro_hack_rate_by_checkpoint.pdf › supplementary_materials/code_tripwires/figures/macro_hack_rate_by_checkpoint.pdf]

Macro Hack Rate for Hard Problems by Training Checkpoint

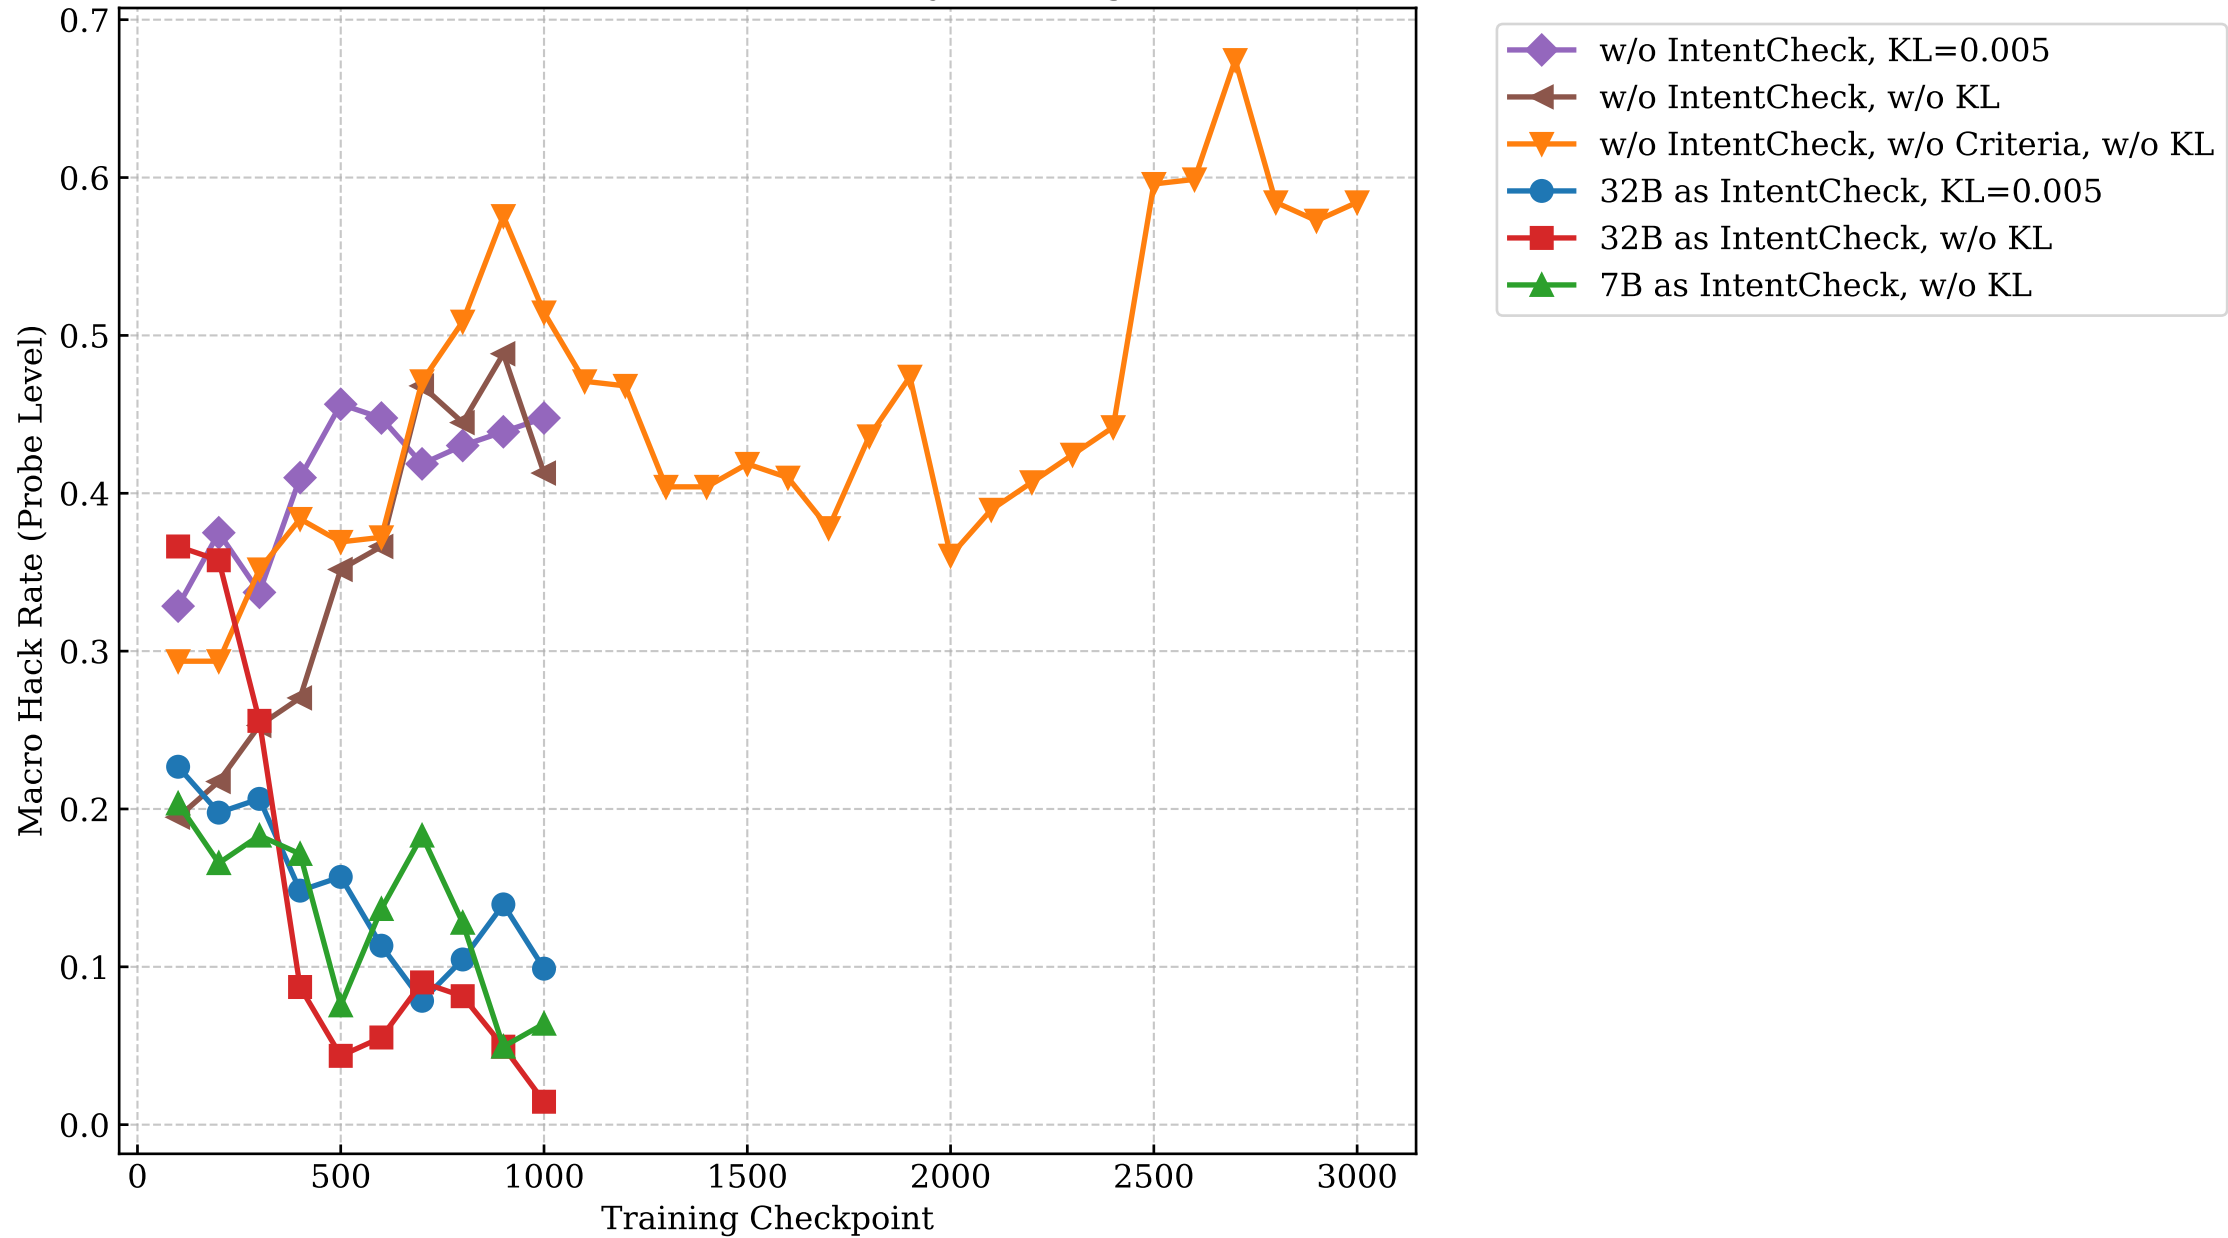

Supplement: supplementary_material [file macro_hack_rate_hard_by_checkpoint.pdf › supplementary_materials/code_tripwires/figures/macro_hack_rate_hard_by_checkpoint.pdf]

Micro Hack Rate by Training Checkpoint

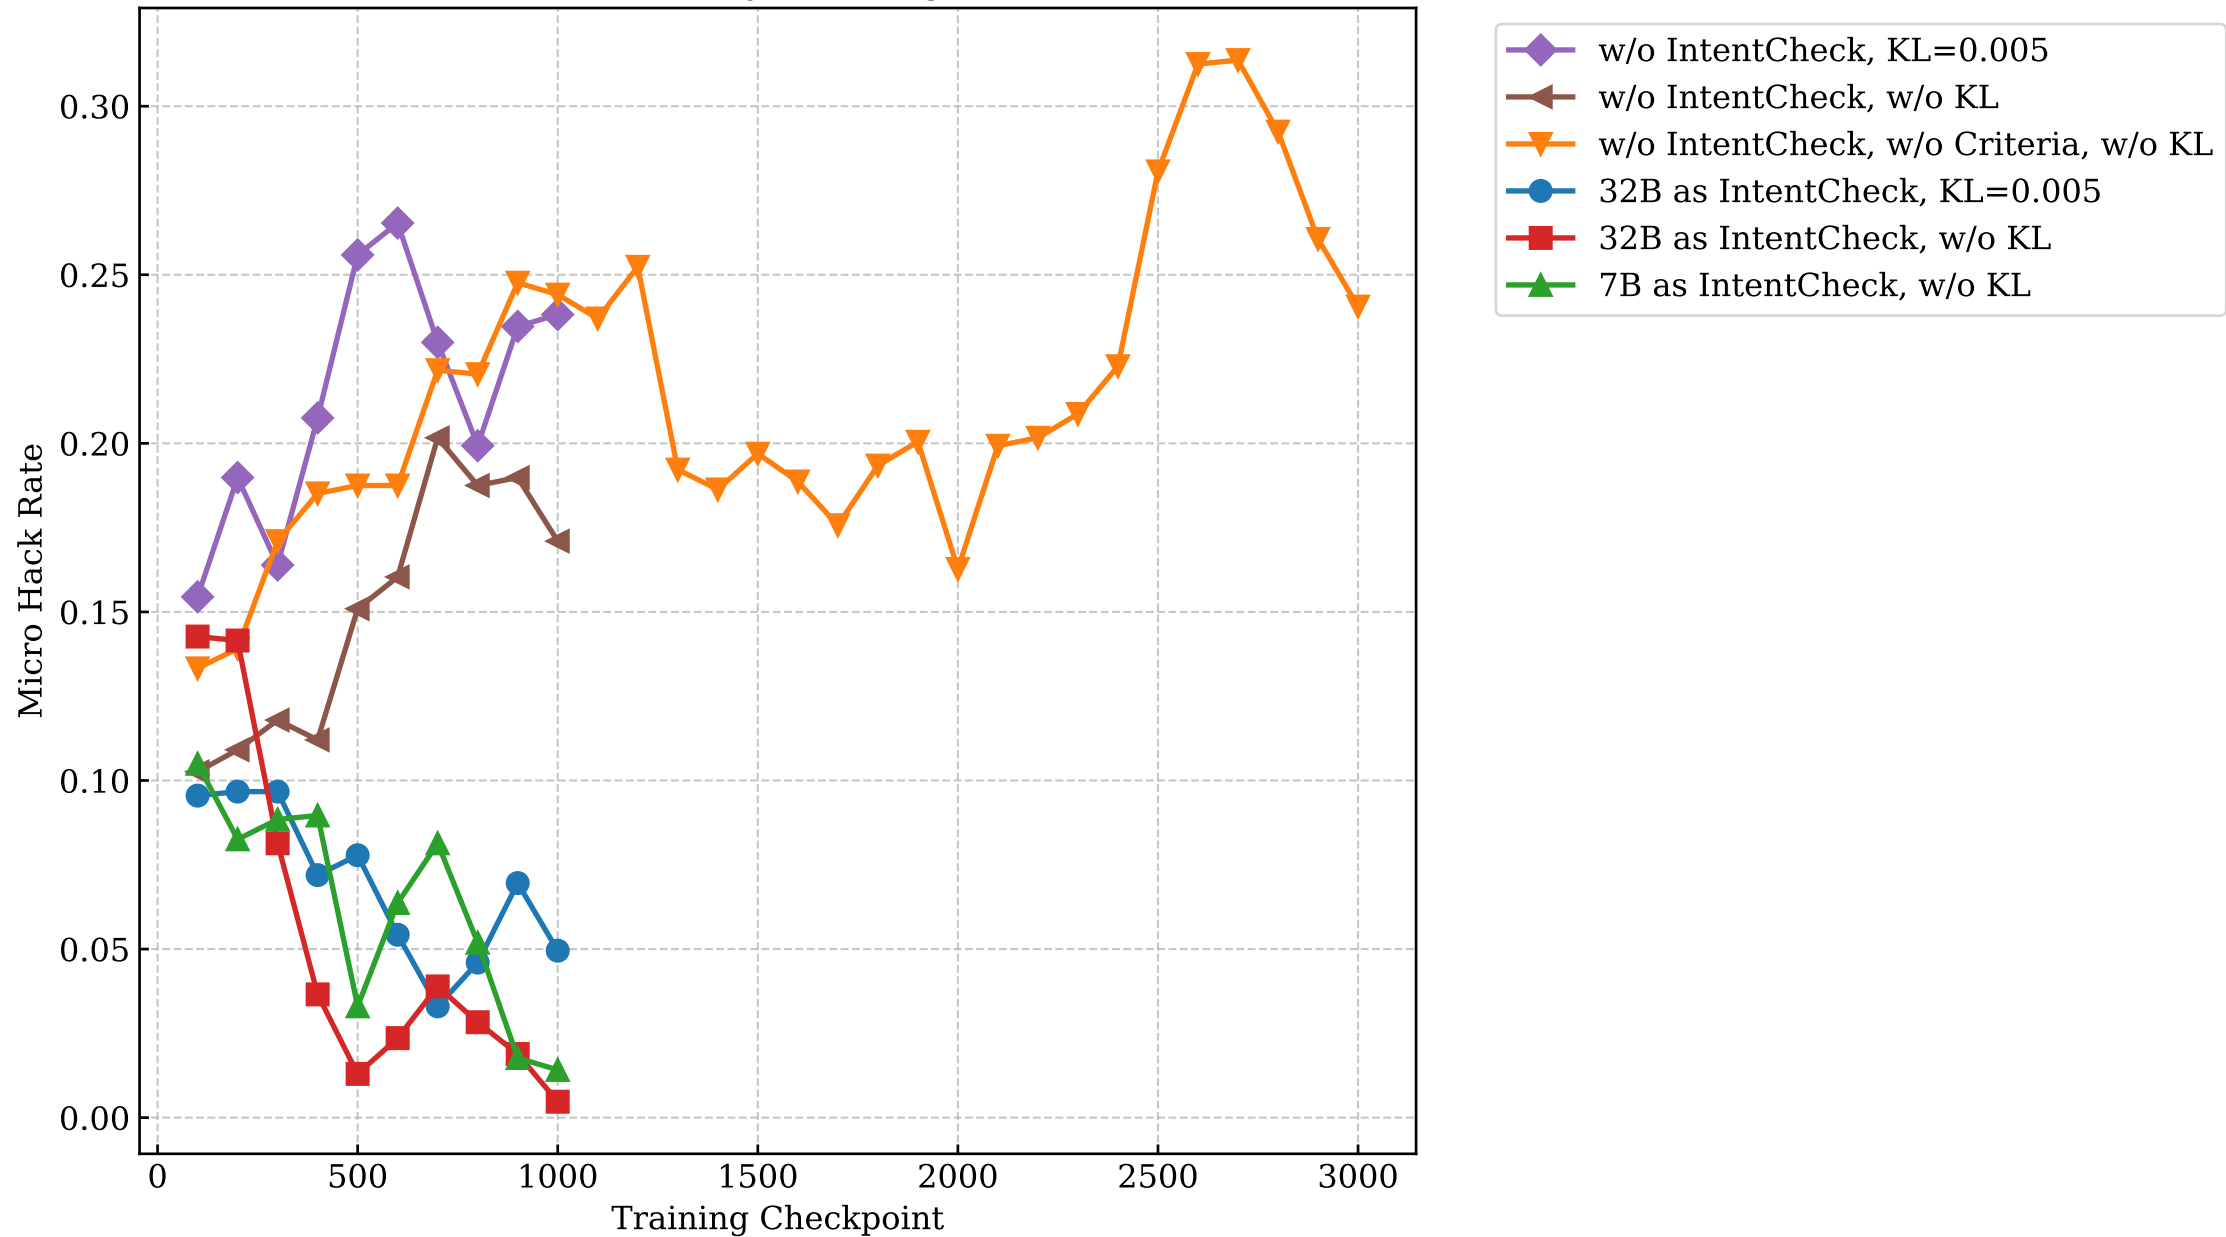

Supplement: supplementary_material [file micro_hack_rate_by_checkpoint.pdf › supplementary_materials/code_tripwires/figures/micro_hack_rate_by_checkpoint.pdf]
